# Supplementary material for: Durability of effects from short-term economic incentives for clinic attendance among HIV positive adults in Tanzania: long-term follow-up of a randomised controlled trial
Source: PubMed Central journal article supplement — BMJ Glob Health. 2021 Dec 24;6(12):e007248. doi: 10.1136/bmjgh-2021-007248 (PMC8710859; doi:10.1136/bmjgh-2021-007248), 2021-12-24
Supplement: bmjgh-2021-007248supp002.pdf [file bmjgh-2021-007248supp002.pdf]

Supplementary Table 1. Comparison of baseline characteristics between participants with observed versus missing outcomes at 36 months, HIV treatment initiates in Tanzania, 2013-2015.

|                               | 36-month retention in care |                  | 36-month mortality |                  |
|-------------------------------|----------------------------|------------------|--------------------|------------------|
|                               | Observed (n=737)           | Missing (n=63)   | Observed (n=700)   | Missing (n=100)  |
| Treatment arm                 |                            |                  |                    |                  |
| Control                       | 108 (96.4%)                | 4 (3.6%)         | 104 (92.9%)        | 8 (7.1%)         |
| Intervention                  | 629 (91.4%)                | 59 (8.6%)        | 596 (86.6%)        | 92 (14.4%)       |
| Participant's sex             |                            |                  |                    |                  |
| Male                          | 265 (91.1%)                | 26 (8.9%)        | 244 (83.8%)        | 47 (16.2%)       |
| Female                        | 472 (92.7%)                | 37 (7.3%)        | 456 (89.6%)        | 53 (10.4%)       |
| Age                           |                            |                  |                    |                  |
| <35 years old                 | 347 (91.1%)                | 34 (8.9%)        | 328 (86.1%)        | 53 (13.9%)       |
| ≥35 years old                 | 390 (93.1%)                | 29 (6.9%)        | 372 (88.8%)        | 47 (11.2%)       |
| Marital status                |                            |                  |                    |                  |
| Married or lives with partner | 327 (94.8%)                | 18 (5.2%)        | 314 (91.0%)        | 31 (9.0%)        |
| Not married or separated      | 410 (90.1%)                | 45 (9.9%)        | 386 (84.8%)        | 69 (15.2%)       |
| Language                      |                            |                  |                    |                  |
| Swahili                       | 452 (92.4%)                | 37 (7.6%)        | 426 (87.1%)        | 63 (12.9%)       |
| Sukuma or other               | 285 (91.6%)                | 26 (8.4%)        | 274 (88.1%)        | 37 (11.9%)       |
| Educational attainment        |                            |                  |                    |                  |
| Some pre-/primary school      | 112 (92.6%)                | 9 (7.4%)         | 105 (86.8%)        | 16 (13.2%)       |
| Primary school                | 406 (92.9%)                | 31 (7.1%)        | 382 (87.4%)        | 55 (12.6%)       |
| Secondary school or more      | 46 (95.8%)                 | 2 (4.2%)         | 46 (95.8%)         | 2 (4.2%)         |
| No formal education           | 173 (89.2%)                | 21 (10.8%)       | 167 (86.1%)        | 27 (13.9%)       |
| Occupation                    |                            |                  |                    |                  |
| Farmer                        | 371 (91.6%)                | 34 (8.4%)        | 353 (87.2%)        | 52 (12.8%)       |
| Business                      | 102 (97.1%)                | 3 (2.9%)         | 97 (92.4%)         | 8 (7.6%)         |
| Other                         | 166 (91.7%)                | 15 (8.3%)        | 159 (87.8%)        | 22 (12.2%)       |
| Unemployed                    | 98 (89.9%)                 | 11 (10.1%)       | 91 (83.5%)         | 18 (16.5%)       |
| Currently working             |                            |                  |                    |                  |
| No                            | 308 (91.1%)                | 30 (8.9%)        | 292 (86.4%)        | 46 (13.6%)       |
| Yes                           | 429 (92.9%)                | 33 (7.1%)        | 408 (88.3%)        | 54 (11.7%)       |
| Wealth index                  |                            |                  |                    |                  |
| Lowest wealth tertile         | 267 (92.4%)                | 22 (7.6%)        | 255 (88.2%)        | 34 (11.8%)       |
| Higher wealth tertile         | 470 (92.0%)                | 41 (8.0%)        | 445 (87.1%)        | 66 (12.9%)       |
| Facility                      |                            |                  |                    |                  |
| Referral Hospital             | 179 (95.2%)                | 9 (4.8%)         | 177 (94.1%)        | 11 (5.9%)        |
| District Hospital             | 474 (90.6%)                | 49 (9.4%)        | 438 (83.7%)        | 85 (16.3%)       |
| Health Centre                 | 84 (94.4%)                 | 5 (5.6%)         | 85 (95.5%)         | 4 (4.5%)         |
| WHO clinical stage            |                            |                  |                    |                  |
| Stage 1                       | 108 (95.6%)                | 5 (4.4%)         | 104 (92.0%)        | 9 (8.0%)         |
| Stage 2                       | 214 (92.2%)                | 18 (7.8%)        | 203 (87.5%)        | 29 (12.5%)       |
| Stage 3                       | 375 (91.2%)                | 36 (8.8%)        | 358 (87.1%)        | 53 (12.9%)       |
| Stage 4                       | 40 (90.9%)                 | 4 (9.1%)         | 35 (79.5%)         | 9 (20.5%)        |
| Time on ART (days)            | 14.0 (12.0-44.0)           | 14.0 (14.0-42.0) | 14.0 (12.0-44.0)   | 23.5 (14.0-45.0) |
| Treatment delay               |                            |                  |                    |                  |
| <90-day treatment delay       | 573 (91.2%)                | 55 (8.8%)        | 536 (85.4%)        | 92 (14.6%)       |
| ≥90-day treatment delay       | 164 (95.3%)                | 8 (4.7%)         | 164 (95.3%)        | 8 (4.7%)         |

Supplementary Table 2. Complete-case sensitivity analysis of the durability of effects from short-term conditional economic incentives provided to HIV treatment initiates for 6 months, Tanzania, 2015-2018.

|                                      | N   | Group estimate (SE)* |               | Between-group difference (95% CI)* |                   |
|--------------------------------------|-----|----------------------|---------------|------------------------------------|-------------------|
|                                      |     | Control              | Intervention  | Unadjusted                         | Adjusted          |
| <b>Retention in care<sup>†</sup></b> |     |                      |               |                                    |                   |
| 24 months                            | 744 | 84.7% (0.034)        | 86.3% (0.014) | 1.5 (-5.6, 8.7)                    | 1.1 (-5.9, 8.1)   |
| 36 months                            | 737 | 77.8% (0.040)        | 83.2% (0.015) | 5.4 (-2.9, 13.7)                   | 5.2 (-3.0, 13.4)  |
| <b>Mortality<sup>‡</sup></b>         |     |                      |               |                                    |                   |
| 24 months                            | 710 | 7.5% (0.025)         | 2.7% (0.007)  | -4.8 (-9.9, 0.3)                   | -5.2 (-10.6, 0.1) |
| 36 months                            | 700 | 8.5% (0.027)         | 5.0% (0.009)  | -3.5 (-9.0, 2.1)                   | -3.9 (-9.7, 1.9)  |

Data are estimates from logistic regression models adjusted for health facility where randomisation occurred.

\* Adjusted for baseline health facility, age, sex, and imbalanced baseline characteristics including language, occupation, and WHO Clinical Stage.

<sup>†</sup> The proportion with evidence of HIV clinic attendance at the time of interest. Excludes those among the original 800 participants who were not successfully traced if the last known status indicated a transfer to another facility.

<sup>‡</sup> The proportion deceased among those with confirmation of death or evidence of vitality (clinic visit on record or contact with tracing staff) as of the time of interest.

Supplementary Table 3. Durability of intention-to-treat effects from short-term conditional economic incentives for clinic attendance provided to HIV treatment initiates for 6 months, Tanzania, 2015-2018.

|                                | N   | Group estimate (SE) |               |              | Between-group difference (95% CI) |                    |                  |
|--------------------------------|-----|---------------------|---------------|--------------|-----------------------------------|--------------------|------------------|
|                                |     | Control             | Cash          | Food         | Cash vs. Control                  | Food vs. Control   | Food vs. Cash    |
| Retention in care <sup>a</sup> |     |                     |               |              |                                   |                    |                  |
| 24 months                      | 800 | 84.4% (0.034)       | 85.1% (0.020) | 87.9% (0.18) | 0.6 (-7.2, 8.5)                   | 3.5 (-4.2, 11.1)   | 2.8 (-2.4, 8.1)  |
| 36 months                      | 800 | 77.8% (0.040)       | 80.7% (0.022) | 85.9% (0.19) | 3.0 (-5.9, 11.8)                  | 8.2 (-0.5, 16.9)   | 5.2 (-0.6, 11.0) |
| Mortality <sup>b</sup>         |     |                     |               |              |                                   |                    |                  |
| 24 months                      | 800 | 7.7% (0.026)        | 2.9% (0.009)  | 2.1% (0.008) | -4.9 (-10.4, 0.6)                 | -5.6 (-11.0, -0.2) | -0.7 (-3.1, 1.7) |
| 36 months                      | 800 | 9.0% (0.029)        | 5.5% (0.013)  | 4.0% (0.011) | -3.6 (-9.7, 2.6)                  | -5.0 (-11.1, 1.0)  | -1.5 (0.4, 1.8)  |

Data are estimates from logistic regression models adjusted for health facility where randomisation occurred.

a) The proportion with documented HIV clinic attendance within 90 days of the last scheduled appointment as of the time of interest. Estimates were multiply imputed for 56 participants at 24 months and 63 participants at 36 months who could not be traced and whose last known status indicated a transfer to another facility.

b) The proportion deceased as of the time of interest. Estimates were multiply imputed for 90 participants at 24 months and 100 participants at 26 months who lacked confirmation of death or evidence of vitality (clinic visit on record or contact with tracing staff).

Supplementary Table 4. Heterogeneity in durability of effects from short-term (6-month) conditional economic incentives provided to HIV treatment initiates by baseline characteristics, Tanzania, 2015-2018.

|                                       | N   | Group estimate (SE)* |                |              |                | Between-group difference (95% CI) | <i>p</i> -interaction |
|---------------------------------------|-----|----------------------|----------------|--------------|----------------|-----------------------------------|-----------------------|
|                                       |     | Control              |                | Intervention |                |                                   |                       |
| <b>Retention in care at 24 months</b> | 800 | <b>84.4%</b>         | <b>(0.034)</b> | <b>86.5%</b> | <b>(0.013)</b> | <b>2.1 (-5.2, 9.3)</b>            |                       |
| Male                                  | 291 | 78.9%                | (0.066)        | 83.4%        | (0.024)        | 4.5 (-9.2, 18.2)                  |                       |
| Female                                | 509 | 87.3%                | (0.039)        | 88.3%        | (0.016)        | 1.0 (-7.3, 9.4)                   | 0.73                  |
| <35 years old                         | 381 | 78.3%                | (0.053)        | 85.1%        | (0.021)        | 6.7 (-4.4, 17.9)                  |                       |
| ≥35 years old                         | 419 | 91.9%                | (0.021)        | 87.7%        | (0.018)        | -4.2 (-12.5, 4.1)                 | 0.16                  |
| Below median wealth                   | 400 | 75.7%                | (0.067)        | 86.7%        | (0.022)        | 11.0 (-2.7, 24.8)                 |                       |
| Above median wealth                   | 400 | 89.5%                | (0.037)        | 86.4%        | (0.017)        | -3.1 (-11.1, 4.9)                 | 0.08                  |
| ≤90-day treatment delay               | 628 | 82.7%                | (0.040)        | 85.8%        | (0.015)        | 3.1 (-5.4, 11.6)                  |                       |
| >90-day treatment delay               | 172 | 91.2%                | (0.059)        | 88.9%        | (0.026)        | -2.3 (-15.0, 10.4)                | 0.56                  |
| Referral Hospital or Health Centre    | 277 | 82.1%                | (0.061)        | 91.2%        | (0.019)        | 9.0 (-3.5, 21.6)                  |                       |
| District Hospital                     | 523 | 85.7%                | (0.042)        | 84.0%        | (0.018)        | -1.7 (-10.6, 7.2)                 | 0.12                  |
| <b>Retention in care at 36 months</b> | 800 | <b>77.8%</b>         | <b>(0.040)</b> | <b>83.3%</b> | <b>(0.015)</b> | <b>5.6 (-2.7, 13.8)</b>           |                       |
| Male                                  | 291 | 68.3%                | (0.074)        | 80.2%        | (0.026)        | 11.9 (-3.6, 27.3)                 |                       |
| Female                                | 509 | 82.6%                | (0.045)        | 85.2%        | (0.017)        | 2.5 (-6.9, 12.0)                  | 0.38                  |
| <35 years old                         | 381 | 73.1%                | (0.057)        | 81.8%        | (0.023)        | 8.6 (-3.3, 20.6)                  |                       |
| ≥35 years old                         | 419 | 83.4%                | (0.023)        | 84.7%        | (0.020)        | 1.3 (-9.8, 12.4)                  | 0.44                  |
| Below median wealth                   | 400 | 72.2%                | (0.071)        | 83.1%        | (0.025)        | 10.9 (-3.8, 25.6)                 |                       |
| Above median wealth                   | 400 | 81.0%                | (0.047)        | 83.5%        | (0.018)        | 2.4 (-7.4, 12.3)                  | 0.36                  |
| ≤90-day treatment delay               | 628 | 76.6%                | (0.046)        | 82.4%        | (0.017)        | 5.8 (-3.7, 15.3)                  |                       |
| >90-day treatment delay               | 172 | 82.3%                | (0.080)        | 86.7%        | (0.028)        | 4.4 (-12.2, 21.0)                 | 0.98                  |
| Referral Hospital or Health Centre    | 277 | 79.6%                | (0.064)        | 89.3%        | (0.021)        | 9.7 (-3.5, 23.0)                  |                       |
| District Hospital                     | 523 | 76.8%                | (0.051)        | 80.2%        | (0.020)        | 3.3 (-7.3, 13.9)                  | 0.30                  |
| <b>Mortality at 24 months</b>         | 800 | <b>7.7%</b>          | <b>(0.026)</b> | <b>2.5%</b>  | <b>(0.006)</b> | <b>-5.2 (-10.5, 0.1)</b>          |                       |
| Male                                  | 291 | 12.0%                | (0.055)        | 3.1%         | (0.011)        | -8.9 (-19.9, 2.1)                 |                       |
| Female                                | 509 | 5.6%                 | (0.027)        | 2.1%         | (0.007)        | -3.4 (-9.0, 2.1)                  | 0.60                  |
| <35 years old                         | 381 | 9.1%                 | (0.039)        | 2.1%         | (0.008)        | -7.0 (-14.8, 0.8)                 |                       |
| ≥35 years old                         | 419 | 6.1%                 | (0.008)        | 2.9%         | (0.009)        | -3.2 (-10.0, 3.6)                 | 0.40                  |
| Below median wealth                   | 400 | 8.8%                 | (0.048)        | 1.6%         | (0.008)        | -7.2 (-16.7, 2.3)                 |                       |
| Above median wealth                   | 400 | 7.1%                 | (0.031)        | 3.0%         | (0.008)        | -4.1 (-10.3, 2.1)                 | 0.38                  |
| ≤90-day treatment delay               | 628 | 8.7%                 | (0.032)        | 2.4%         | (0.007)        | -6.3 (-12.6, 0.0)                 |                       |
| >90-day treatment delay               | 172 | 4.1%                 | (0.040)        | 2.8%         | (0.014)        | -1.3 (-9.6, 7.0)                  | 0.45                  |
| Referral Hospital or Health Centre    | 277 | 10.1%                | (0.047)        | 2.5%         | (0.010)        | -7.6 (-17.0, 1.9)                 |                       |
| District Hospital                     | 523 | 6.4%                 | (0.031)        | 2.5%         | (0.008)        | -4.0 (-10.3, 2.4)                 | 0.59                  |
| <b>Mortality at 36 months</b>         | 800 | <b>9.0%</b>          | <b>(0.029)</b> | <b>4.7%</b>  | <b>(0.008)</b> | <b>-4.3 (-10.2, 1.6)</b>          |                       |
| Male                                  | 291 | 13.2%                | (0.059)        | 4.9%         | (0.014)        | -8.3 (-20.2, 3.6)                 |                       |
| Female                                | 509 | 7.0%                 | (0.030)        | 4.6%         | (0.010)        | -2.4 (-8.7, 3.9)                  | 0.42                  |
| <35 years old                         | 381 | 11.2%                | (0.043)        | 3.9%         | (0.011)        | -7.3 (-16.0, 1.4)                 |                       |
| ≥35 years old                         | 419 | 6.3%                 | (0.011)        | 5.4%         | (0.012)        | -0.9 (-8.2, 6.4)                  | 0.24                  |
| Below median wealth                   | 400 | 9.7%                 | (0.051)        | 4.2%         | (0.013)        | -5.6 (-15.9, 4.8)                 |                       |
| Above median wealth                   | 400 | 8.6%                 | (0.033)        | 5.0%         | (0.011)        | -3.6 (-10.5, 3.3)                 | 0.71                  |
| ≤90-day treatment delay               | 628 | 10.3%                | (0.035)        | 4.3%         | (0.009)        | -6.0 (-13.0, 1.0)                 |                       |
| >90-day treatment delay               | 172 | 4.2%                 | (0.041)        | 6.3%         | (0.020)        | 2.1 (-6.9, 11.0)                  | 0.24                  |
| Referral Hospital or Health Centre    | 277 | 10.2%                | (0.047)        | 3.4%         | (0.012)        | -6.8 (-16.3, 2.7)                 |                       |
| District Hospital                     | 523 | 8.4%                 | (0.036)        | 5.4%         | (0.011)        | -2.9 (-10.3, 4.4)                 | 0.36                  |
